# Supplementary material for: SnS2@reduced graphene oxide nanocomposites as anode materials with high capacity for rechargeable lithium ion batteries
Source: Royal Society of Chemistry journal article supplement (doi:10.1039/c2jm35137d), 2012-01-01
Supplement: c2jm35137d.pdf [file c2jm35137d.pdf]

# Electronic Supplementary Information (ESI) for **SnS<sub>2</sub>@reduced graphene oxide nanocomposites as anode materials with high capacity for rechargeable lithium ion batteries**

Jiefu Yin,<sup>a</sup> Huaqiang Cao,<sup>\*a</sup> Zhongfu Zhou,<sup>b</sup> Jingxian Zhang,<sup>c</sup> Meizhen Qu<sup>c</sup>

<sup>a</sup> Department of Chemistry, Tsinghua University, Beijing 100084 (P. R. China).

<sup>b</sup> Key Laboratory for Materials Microstructures, Shanghai University, Shanghai 200444, China

<sup>c</sup> Chengdu Institute of Organic Chemistry, Chinese Academy of Sciences, Chengdu 610041, China

\*Corresponding author. E-mail: hqcao@mail.tsinghua.edu.cn

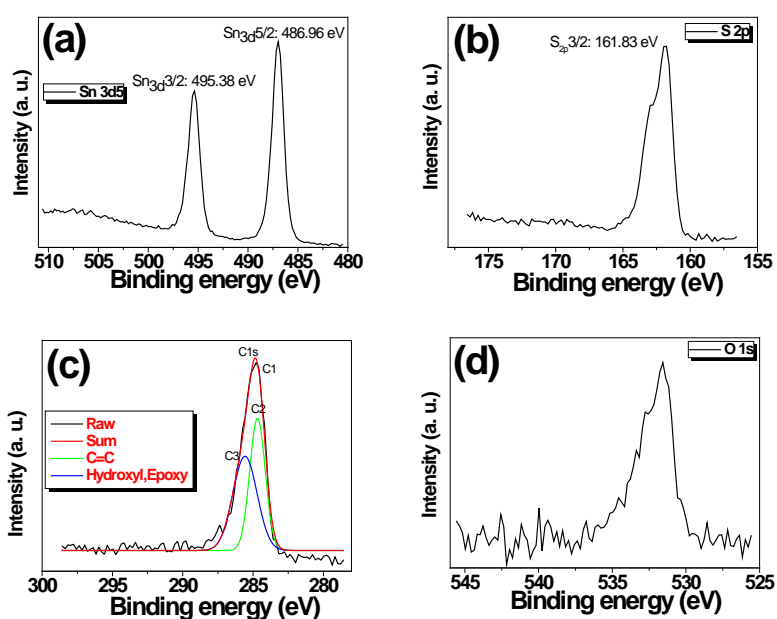

**Fig. S1** XPS spectra of (a) Sn3d, (b) Sn2p, (c) C1s, and (d)O1s.

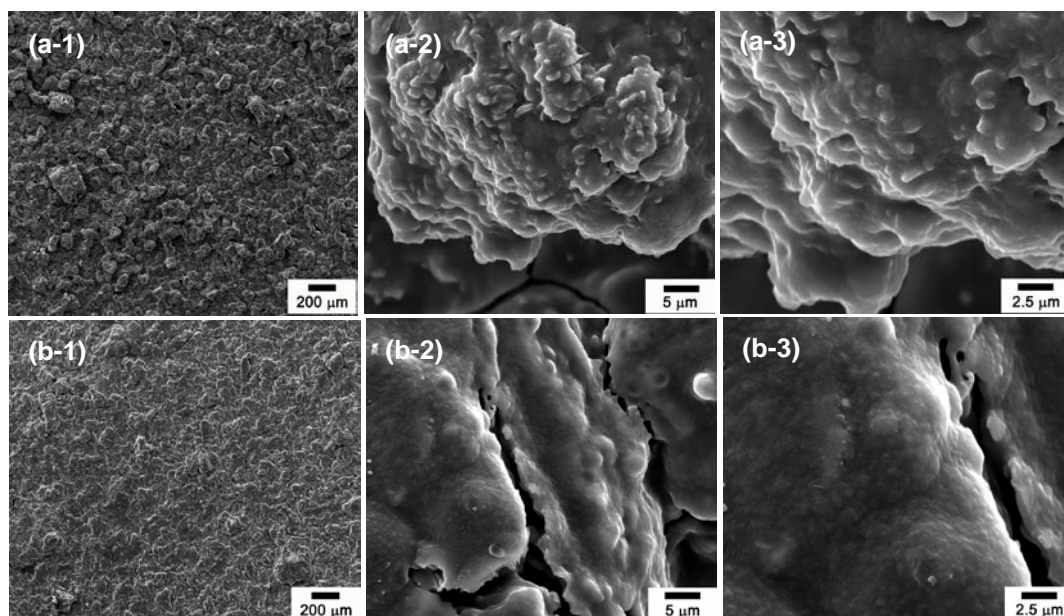

**Fig. S2** SEM images of the SSG electrodes after (a) 1st cycle, (b) 60th cycle with different magnifying powers.
